# Supplementary material for: The Validity of Cutaneous Body Image as a Construct and as a Mediator of the Relationship Between Cutaneous Disease and Mental Health
Source: PubMed Central journal article supplement — Dermatol Ther (Heidelb). 2020 Jan 16;10(1):203–11. doi: 10.1007/s13555-020-00351-5 (PMC6994570; doi:10.1007/s13555-020-00351-5), 2020-01-16
Supplement: 13555_2020_351_MOESM1_ESM.pdf [file 13555_2020_351_MOESM1_ESM.pdf]

Table S1. Correlations for Cutaneous Body image and Other Study Variables

|                                                                       | 1     | 2     | 3     | 4     | 5     | 6      | 7      | 8      | 9     | 10    | 11    | 12     | 13    | 14    | 15   | 16 |
|-----------------------------------------------------------------------|-------|-------|-------|-------|-------|--------|--------|--------|-------|-------|-------|--------|-------|-------|------|----|
| 1. Cutaneous Body Image                                               | --    | --    | --    | --    | --    | --     | --     | --     | --    | --    | --    | --     | --    | --    | --   | -- |
| 2. I like the overall appearance of my skin.                          | .76†  | --    | --    | --    | --    | --     | --     | --     | --    | --    | --    | --     | --    | --    | --   | -- |
| 3. I like my complexion or overall color of my skin.                  | .79†  | .66†  | --    | --    | --    | --     | --     | --     | --    | --    | --    | --     | --    | --    | --   | -- |
| 4. I like the appearance of the skin of my skin.                      | .79†  | .67†  | .67†  | --    | --    | --     | --     | --     | --    | --    | --    | --     | --    | --    | --   | -- |
| 5. I like the complexion or the overall color of the skin of my face. | .82†  | .57†  | .77†  | .84†  | --    | --     | --     | --     | --    | --    | --    | --     | --    | --    | --   | -- |
| 6. I am very satisfied with my hair.                                  | .59†  | .32†  | .36†  | .29†  | .34†  | --     | --     | --     | --    | --    | --    | --     | --    | --    | --   | -- |
| 7. I am satisfied with the appearance of my fingernails.              | .68†  | .37†  | .36†  | .36†  | .40†  | .30†   | --     | --     | --    | --    | --    | --     | --    | --    | --   | -- |
| 8. I am satisfied with the appearance of my toenails.                 | .66†  | .33†  | .33†  | .29†  | .35†  | .35†   | .62†   | --     | --    | --    | --    | --     | --    | --    | --   | -- |
| 9. Global Self-Esteem                                                 | .39†  | .24†  | .32†  | .33†  | .38†  | .24†   | .26†   | .22**  | --    | --    | --    | --     | --    | --    | --   | -- |
| 10. Appearance-Related Self-Esteem                                    | .50†  | .40†  | .31†  | .47†  | .41†  | .34†   | .29†   | .32†   | .59†  | --    | --    | --     | --    | --    | --   | -- |
| 11. Body Dissatisfaction                                              | -.28† | -.27† | -.26† | -.23† | -.24† | -.09   | -.17** | -.15*  | -.26† | -.44† | --    | --     | --    | --    | --   | -- |
| 12. Dietary Restraint                                                 | -.05  | .01   | -.01  | -.04  | -.04  | -.14*  | -.01   | -.04   | -.002 | -.15* | .18** | --     | --    | --    | --   | -- |
| 13. Drive for Thinness                                                | -.12  | -.12  | -.02  | -.16* | -.11  | -.05   | -.07   | -.09   | -.24† | -.41† | .52†  | .47†   | --    | --    | --   | -- |
| 14. Weight-Related Esteem                                             | .35†  | .31†  | .24†  | .26†  | .26†  | .15*   | .24†   | .31†   | .38†  | .61†  | -.73† | -.20** | -.58† | --    | --   | -- |
| 15. Anxiety                                                           | -.31† | -.22† | -.25† | .34†  | -.32† | -.11   | -.19** | -.16** | -.46† | -.32† | .13*  | -.02   | .28†  | -.24† | --   | -- |
| 16. Depression                                                        | -.35† | .30†  | -.25† | -.31† | -.32† | -.19** | -.25†  | -.20** | -.65† | -.53† | .25†  | .06    | .35†  | -.39† | .60† | -- |

Note. \* p < .05, \*\* p < .01, † < .001
